# Supplementary material for: Population-based cross-sectional study of barriers to utilisation of refraction services in South India: Rapid Assessment of Refractive Errors (RARE) Study
Source: PubMed Central journal article supplement — BMJ Open. 2011 Jul 15;1(1):e000172. doi: 10.1136/bmjopen-2011-000172 (PMC3191577; doi:10.1136/bmjopen-2011-000172), 2011-07-15
Supplement: bmjopen-2011-000172.draft_revisions.pdf [file bmjopen-2011-000172.draft_revisions.pdf]

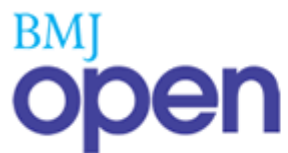

**Barriers to Utilisation of Refraction Services in South India:  
Rapid Assessment of Refractive Errors (RARE) Study**

|                               |                                                                                                                                                                                                             |
|-------------------------------|-------------------------------------------------------------------------------------------------------------------------------------------------------------------------------------------------------------|
| Journal:                      | <i>BMJ Open</i>                                                                                                                                                                                             |
| Manuscript ID:                | bmjopen-2011-000172                                                                                                                                                                                         |
| Article Type:                 | Research                                                                                                                                                                                                    |
| Date Submitted by the Author: | 12-May-2011                                                                                                                                                                                                 |
| Complete List of Authors:     | Marmamula, Srinivas; L V Prasad Eye Institute, ICARE<br>Keeffe, Jill; Centre for Eye Reseach Australia<br>Raman, Usha; L V Prasad Eye Institute, Communications<br>Rao, Gullapalli; LV Prasad Eye Institute |
| <b>Subject Heading</b>:       | Epidemiology                                                                                                                                                                                                |
| Keywords:                     | Public health < INFECTIOUS DISEASES, Refractive Errors , Cataract<br>and refractive surgery < OPHTHALMOLOGY                                                                                                 |
|                               |                                                                                                                                                                                                             |

SCHOLARONE™  
Manuscripts

Peer Review Only

**Barriers to Utilisation of Refraction Services in South India:  
Rapid Assessment of Refractive Errors (RARE) Study**

Srinivas Marmamula, MSc<sup>1,2,5</sup>, Jill E Keeffe, PhD<sup>2,3</sup>, Usha Raman, PhD<sup>1,2,4</sup>

Gullapalli N Rao, MD<sup>1,2</sup>

<sup>1</sup> International Centre for Advancement of Rural Eye care, L V Prasad Eye Institute,  
Hyderabad, India

<sup>2</sup> Vision Cooperative Research Centre, Sydney, Australia

<sup>3</sup> Centre for Eye Research Australia, University of Melbourne, Melbourne, Australia

<sup>4</sup> Centre for Communication, L V Prasad Eye Institute, Hyderabad, India

<sup>5</sup> Bausch & Lomb School of Optometry, L V Prasad Eye Institute, Hyderabad, India

Address for correspondence:

Srinivas Marmamula

International Centre for Advancement of Rural Eye care

L V Prasad Eye Institute, Banjara Hills

Hyderabad 500 034, India

Phone: 91 40 3061 5613

Email: sriptom@lvpei.org

Running title: Barriers to Utilisation of Refraction Services

Key words: Barriers, presbyopia, rapid assessment, uncorrected refractive errors,

Abstract: 186 words; Text: 2480 words; Tables: 3; References: 22

*Barriers to utilisation of refraction of services*

1  
2  
3 **Aim:** To assess the barriers to the uptake of refraction services in the age group of 15–49  
4 years in rural Andhra Pradesh, India.  
5  
6

7  
8 **Methods:** A population-based cross-sectional study was conducted using cluster random  
9 sampling to enumerate 3,300 individuals from 55 clusters. A validated questionnaire was  
10 used to elicit information on barriers to utilization of services among individuals with  
11 uncorrected refractive error (presenting visual acuity (VA) <6/12 but improving to  $\geq 6/12$   
12 using a pinhole) and presbyopia (binocular near vision <N8 in individuals aged >35 years  
13 with binocular distance VA of  $\geq 6/12$ ).  
14  
15  
16  
17  
18  
19  
20  
21

22 **Results:** 3095 (94%) were available for examination. Those with uncorrected refractive  
23 errors cited affordability as the main barrier to the uptake of eye care services. Among  
24 people with uncorrected presbyopia, lack of “felt need” was the leading barrier.  
25  
26  
27  
28

29 **Conclusion:** The barriers that were ‘relatively easy to change’ were reported by those  
30 with uncorrected refractive errors in contrast to ‘difficult to change’ barriers reported by  
31 those with uncorrected presbyopia. Together with the data on prevalence and an  
32 understanding of the barriers for the uptake of services are critical to the planning of  
33 refractive error services.  
34  
35  
36  
37  
38  
39  
40  
41  
42  
43  
44  
45  
46  
47  
48  
49  
50  
51  
52  
53  
54  
55  
56  
57  
58  
59  
60

**ARTICLE SUMMARY****Article focus**

- Several barriers limit the uptake of refraction services
- Understanding and addressing the barriers is essential to tackle problem of uncorrected refractive errors and presbyopia

**Key messages**

- Affordability is the important barrier among individuals with uncorrected errors
- Lack of felt need and awareness are important barriers reported by people with uncorrected presbyopia

**Strengths and limitations**

- Large sample size, a good response rate and sound methodology are the strengths of the study
- The study did not include individuals aged 50 and older and hence the results cannot be generalized to the general population.

**INTRODUCTION**

Recent global estimates reveal that 153 million people have uncorrected refractive errors in addition to the 161 million people who are visually impaired due to other causes. [1]

Despite the availability of a simple remedy, uncorrected refractive errors cause 16% of the blindness [2] and 46% of the visual impairment across all age groups in the Indian state of Andhra Pradesh. [3] Addressing the huge need for correction of uncorrected refractive error is one of the priorities of the global initiative VISION 2020: The Right to Sight. [4]

Uncorrected presbyopia is increasingly recognized as a major problem across the world. Recent estimates by Holden et al. [5] have revealed that nearly 410 million people have near visual impairment due to uncorrected presbyopia. Several studies have underscored the impact of uncorrected presbyopia on the quality of life in individuals in rural settings. [6-8] Recent studies make it clear that the impact of uncorrected presbyopia is not limited to literate populations living in urban areas.

Given the very limited data specifically focused on uncorrected refractive errors and presbyopia, especially in India, further research is necessitated on barriers to the uptake of services. Understanding the perceived barriers is a prerequisite to formulating effective strategies to provide efficient and effective eye care. In this paper, we discuss the patient-reported barriers to the uptake of refraction services among individuals aged 15 to 49 years living in rural areas of the South Indian state of Andhra Pradesh.

## **MATERIALS AND METHODS**

The instrument that was used to collect information on barriers was a part of Rapid Assessment of Refractive Errors (RARE) survey that was conducted in Mahbubnagar district in Andhra Pradesh, India.[9] The five administrative divisions (mandals) in this district each consisting of 20-30 villages were selected divided into clusters of almost equal population size. In total, 55 clusters were randomly selected using random numbers generated by an MS Excel worksheet and attempts were made to examine 60 subjects from each cluster to obtain the sample size needed.

### **Study procedures**

The survey team consisting of a vision technician and two community eye health workers visited subjects in their homes. Oral informed consent was sought from each subject after explaining the study and survey procedures. In the case of subjects aged below 18 years, permission was obtained from either the parent or guardian.

Presenting visual acuity (VA) in each eye was measured using a logMAR chart at a distance of 4 meters. Subjects with VA < 6/12 (0.3 logMAR) in either eye were re-assessed using a multiple pinhole occluder. Near vision was assessed binocularly using the N notation chart at the customary working distance (usual range 33–35 cm) for each individual.

Demographic information including education level, occupation, current and previous use of spectacles was collected through a brief personal interview. The questionnaire that was

*Barriers to utilisation of refraction of services*

1  
2  
3 validated and used in the Andhra Pradesh Eye Disease Study (APEDS) was used to in  
4  
5 this study [10]. The response options in the questionnaire were derived from focus group  
6  
7 discussions held in the community [11] and were used in previous studies [12, 13]. The  
8  
9 questionnaire consisted of a list of 15 barriers. The questionnaire was administered in the  
10  
11 regional languages (Telugu or Hindi) after the eye exam to those people with uncorrected  
12  
13 refractive error and/ or uncorrected presbyopia. If the response/s that was reported by the  
14  
15 subject was available in the list, then it was marked. In cases, where one or more barriers  
16  
17 reported were not in the list, they were fully specified under 'others'. If an individual  
18  
19 gave more than one reason, all responses were marked and the individual was asked to  
20  
21 specify which was the most important.  
22  
23  
24  
25  
26  
27  
28

29 The barriers were then grouped under themes 1) Lack of awareness if the individual was  
30  
31 unaware of uncorrected refractive errors or presbyopia; 2) Lack of felt need if the  
32  
33 individual was aware of uncorrected refractive errors or presbyopia but had never felt the  
34  
35 need for consultation; 3) Lack of affordability if the individual was aware uncorrected  
36  
37 refractive error and presbyopia but felt they could not afford the cost of eye exam and/or  
38  
39 spectacles; 4) Lack of accessibility if the individual stated that services were too far away  
40  
41 or difficult to reach ; 5) Personal barrier if the individual mentioned other health related  
42  
43 problems, fear, or others such as emotional and psychological issues.  
44  
45  
46  
47  
48  
49

**Study definitions**

50  
51  
52 A barrier was defined as the reason for not accessing an eye care facility by persons who  
53  
54 could benefit from spectacles. Visual impairment was defined as binocular presenting VA  
55  
56  
57  
58  
59  
60

*Barriers to utilisation of refraction of services*

1  
2  
3 <math>6/12</math>. Uncorrected refractive error was defined as presenting VA <math>6/12</math> but improving  
4  
5 to  $\geq 6/12$  on using a pinhole. Uncorrected presbyopia was defined as binocular near vision  
6  
7 <math>N8</math> at the subject's customary working distance in subjects aged >35 years and who had  
8  
9 binocular presenting distance VA of 6/12 (logMAR 0.3) or better. It was classified as  
10  
11 mild (presenting near vision <math>N8</math> to N10), moderate (worse than N10 to N18) and severe  
12  
13 (<math>N18</math>).  
14  
15  
16  
17  
18  
19

20 Data management and analysis was conducted SPSS 16.0 (SPSS Inc., Chicago, IL)  
21  
22 software. All persons with visual acuity <math>6/12</math> in the better eye were referred to the  
23  
24 nearest eye care facility for management. The survey was conducted in accordance with  
25  
26 ethical principles and adhered to the Declaration of Helsinki and was carried out during  
27  
28 February–May 2008. The study protocol was reviewed and approved by the Institutional  
29  
30 Review Board (IRB) of L V Prasad Eye Institute, Hyderabad, India.  
31  
32  
33  
34  
35  
36  
37  
38  
39  
40  
41  
42  
43  
44  
45  
46  
47  
48  
49  
50  
51  
52  
53  
54  
55  
56  
57  
58  
59  
60



**RESULTS**

Of the 3,300 subjects enumerated from 55 clusters, the data were available from 3,095 subjects (94%) for analysis. The mean age of males and females were similar ( $p=0.34$ ) and over half the participants had no education. The participants' characteristics are presented in Table 1.

**Table 1: Participants' Characteristics (n=3095)**

|                        | <b>n (%)</b> |
|------------------------|--------------|
| <b>Age group (yrs)</b> |              |
| 15 – 29                | 1540 (49.8)  |
| 30 – 39                | 739 (23.9)   |
| 40 – 49                | 816 (26.4)   |
| <b>Gender</b>          |              |
| Male                   | 1626 (52.5)  |
| Female                 | 1469 (47.5)  |
| <b>Education level</b> |              |
| No Education           | 1794 (58.0)  |
| School education       | 1095 (35.4)  |
| University education   | 206 (6.7)    |
| <b>Occupation</b>      |              |
| Unskilled labor        | 1722 (55.6)  |
| Home duties            | 557 (18.0)   |
| Student                | 392 (12.7)   |
| Skilled jobs           | 227 (7.3)    |
| Clerical /business     | 197 (6.4)    |

### **Uncorrected Refractive Errors**

Refractive errors were present in either eye of 187 subjects (age and gender adjusted prevalence of 4.8%, 95% CI, 4.0-5.5%) and it was uncorrected in 139 subjects. Of these 139 individuals, 30.9% (43 subjects) cited an economic reason as a barrier to the uptake of services and 23.0% (32 subjects) cited a lack of 'felt need' for the refractive correction. Another 16.5% (23) persons cited 'lack of access' as the barrier for uptake of services (Table 2). The barriers were similar among the individuals who had uncorrected refractive errors in one or both eyes (Table 2). In 88 (2.8%) subjects, uncorrected refractive errors were present in better eye and were the cause of visual impairment. An economic reason and 'lack of access' were reported as the most important barriers in this group (Table 2).

Out of 139 subjects with uncorrected refractive errors in either eye, 63 individuals gave more than one response. Personal reasons and lack of 'felt need' were the most common additional barriers. These barriers were similar in 45 individuals with uncorrected refractive errors in the better eye and who gave more than one response (Table 2).

**Table 2: Barriers and Uncorrected Refractive Errors (URE) in either eye or better**

|                   | Eye                           |                       | Eye                           |                       |
|-------------------|-------------------------------|-----------------------|-------------------------------|-----------------------|
|                   | URE Either eye                |                       | URE in better eye             |                       |
|                   | n (%)                         | n (%)                 | n (%)                         | n (%)                 |
|                   | <b>Most important barrier</b> | <b>Second barrier</b> | <b>Most important barrier</b> | <b>Second barrier</b> |
| Economic reasons  | 43 (30.9)                     | 8 (12.7)              | 32 (36.4)                     | 6 (13.3)              |
| Lack of felt need | 32 (23.0)                     | 11 (17.5)             | 21 (23.9)                     | 7 (15.6)              |
| Lack of access    | 23 (16.5)                     | 7 (11.1)              | 12 (13.6)                     | 4 (8.9)               |
| Personal reasons  | 23 (16.5)                     | 29 (46.0)             | 12 (13.6)                     | 23 (51.1)             |
| Lack of awareness | 18 (12.9)                     | 8 (12.7)              | 11 (12.5)                     | 5 (11.1)              |
| <b>Total</b>      | <b>139 (100.0)</b>            | <b>63 (100.0)</b>     | <b>88 (100.0)</b>             | <b>45 (100.0)</b>     |

**Uncorrected presbyopia**

Among the 974 subjects aged above 35 years, presbyopia was present in 616 (63.2%; 95% CI, 60.2-66.2) subjects. It was uncorrected in 512/616 (83.1%) subjects. Lack of 'felt need' was the most important barrier to the uptake of services in 46.5% (238) of individuals. Lack of 'awareness' was reported by 16% (82) participants. 'Lack of accessibility', economic and personal reasons were reported by 13%, 12.5% and 11.7% respectively (Table 3).

*Barriers to utilisation of refraction of services*

The lack of 'felt need' was the main barrier irrespective of severity of uncorrected presbyopia: 46.5% (124 subjects) with mild and 44.4% (139 subjects) with moderate presbyopia (Table 3). 'Lack of accessibility' to services as a barrier was higher among the subjects with moderate presbyopia compared to mild presbyopia (16% versus 9%, chi square test,  $p=0.009$ ). Lack of awareness was higher in mild presbyopes compared to moderate presbyopes (23% and 10% respectively, chi square,  $p=0.001$ ). Of 512 subjects with uncorrected presbyopia, 201 individuals gave more than one response. Lack of 'felt need' and personal reasons were the leading barriers in this group (Table 3).

**Table 3: Barriers and uncorrected presbyopia**

|                   | Most important barrier |                     |                    | Second barrier     |
|-------------------|------------------------|---------------------|--------------------|--------------------|
|                   | Mild presbyopia        | Moderate Presbyopia | Total Presbyopia*  | Total Presbyopia*  |
|                   | n (%)                  | n (%)               | n (%)              | n (%)              |
| Lack of felt need | 117 (50.2)             | 120 (43.2)          | 237 (46.4)         | 50 (24.9)          |
| Lack of awareness | 53 (22.7)              | 29 (10.4)           | 82 (16.0)          | 40 (19.9)          |
| Economics         | 22 (9.4)               | 42 (15.1)           | 64 (12.5)          | 28 (13.9)          |
| Accessibility     | 21 (9.0)               | 47 (16.9)           | 68 (13.3)          | 39 (19.4)          |
| Personal reasons  | 20 (8.6)               | 40 (14.4)           | 60 (11.7)          | 44 (21.9)          |
|                   | <b>233 (100.0)</b>     | <b>278 (100.0)</b>  | <b>511 (100.0)</b> | <b>201 (100.0)</b> |

\* One subject with severe presbyopia was excluded from analysis

*Barriers to utilisation of refraction of services***DISCUSSION**

The utilization of refraction services is as important as provision of services, to address the burden of uncorrected refractive errors and presbyopia. To our knowledge, this is first such study to report barriers for uptake of refraction services from India that can have implications for the planning and implementation of providing eye care services. The barriers reported by the individuals can be categorized as “relatively easy to change” and “difficult to change”. For example, economic barriers and accessibility related can be categorized as relatively easy to change. The initiative to change this is with the service provider. Lack of ‘felt need’, awareness and personal reasons such as fear and other competing commitments are more difficult to change and a sustained long term effort is required both at the individual level and by the service provider to create an impact.

For uncorrected refractive errors, the most important barriers are ‘easy to change’ but importantly almost half of the participants (63/139) reported more than one barrier, most of which were in the ‘difficult to change’ category. In a contrast to this, ‘difficult to change’ are the leading barriers for uncorrected presbyopia. Even among those reporting a second barrier, ‘difficult to change’ barriers are also the most important. These findings reflect on the need for a rigorous campaign to address the benefits of correction of presbyopia.

Refraction services are provided mainly at primary and to some extent at secondary level of care in India. The study highlights economic reason as the leading barrier for uptake of services for correction of refractive errors and lack of ‘felt need’ as the leading barrier for uncorrected presbyopia. Economic barrier includes cost of a consultation and the cost of

*Barriers to utilisation of refraction of services*

1  
2  
3 spectacles. In the context of the study, refraction services are often provided free of cost,  
4  
5 and a patient needs to pay for spectacles. Hence the economic barrier is mainly related to  
6  
7 the cost of spectacles. . Several studies from developing countries, including Nirmalan  
8  
9 and colleagues from South India, [14] and Kovai and colleagues who found that 37% of  
10  
11 those who noticed a change in vision did not utilize eye care services for economic  
12  
13 reasons in rural Andhra Pradesh [13] have identified economic reason as an important  
14  
15 barrier for uptake of services. [15-17]  
16  
17  
18  
19  
20  
21

22 Provision of spectacles at a low cost and an affordable pricing system will address the  
23  
24 issue of uncorrected refractive errors and presbyopia. If the cost of spectacles is high, it  
25  
26 may be unaffordable by many people. Hence, the pricing system should reflect the  
27  
28 purchasing capacity of the majority in the community so as to encourage the sale of  
29  
30 spectacles. Anecdotal evidence in these rural communities suggest that an individual may  
31  
32 be able to afford two days' wages (approximately 150 to 200 Indian rupees or USD 4 to  
33  
34 5) to buy a pair spectacles.  
35  
36  
37  
38  
39  
40

41 Besides affordability, the quality, comfort, endurance and accuracy of the prescription are  
42  
43 equally important. Dandona et al. [18] found that nearly one-third of the subjects with  
44  
45 correctable visual impairment, discontinued the use of spectacles, either because they felt  
46  
47 the prescription was wrong or that the spectacles were uncomfortable. There are similar  
48  
49 reports from Timor-Leste. [16]  
50  
51  
52  
53  
54  
55  
56  
57  
58  
59  
60

*Barriers to utilisation of refraction of services*

1  
2  
3 In the current study, a quarter of those with uncorrected refractive errors did not feel the  
4 need for correction possibly because they did not face problems in their day-to-day tasks.  
5  
6 Although other barriers cannot be ignored, the lack of felt need for correction of  
7  
8 refractive errors is important in considering targets for the elimination of disability due to  
9  
10 uncorrected refractive errors. Setting targets purely based on prevalence estimates from  
11  
12 epidemiological studies, without discounting for those who do not feel the need for  
13  
14 correction, may be difficult to achieve.  
15  
16  
17  
18  
19  
20  
21

22 Only a few studies have referred to the prevalence and impact of presbyopia from the  
23  
24 developing world. [6-8] In the present study, 'lack of felt need' followed by 'lack of  
25  
26 awareness' is a major barrier to the uptake of services, among people with presbyopia.  
27  
28 Together they accounted for over 60% of the responses. Sherwin et al concluded that a  
29  
30 quarter of the subjects with presbyopia in a rural Kenyan population did not consider  
31  
32 their condition to be important. [19] Nirmalan et al. reported that about 24% of the  
33  
34 subjects did not consider presbyopia to be a serious problem and another 24% of them  
35  
36 felt that they were able to see adequately. [20]  
37  
38  
39  
40  
41  
42

43 Lack of awareness in is another important barrier that was cited frequently by the  
44  
45 presbyopic population in the current study which did not include individuals aged 50  
46  
47 years and above as in other studies in presbyopia. Here, this was significantly higher in  
48  
49 those with mild presbyopia than the moderate presbyopia group. Lack of access is  
50  
51 reported to be more common for those with moderate presbyopia compared to mild  
52  
53  
54  
55  
56  
57  
58  
59  
60

*Barriers to utilisation of refraction of services*

1  
2  
3 presbyopia. As near vision decreases to a level where it affects daily routine, people seem  
4  
5 more eager to use services and accessibility becomes a crucial factor.  
6  
7

8  
9  
10 The lack of 'felt need' was reported by over 46% of all barriers. Extrapolating the results  
11  
12 from this study, even if we consider a conservative estimate of 40% of the 410 million  
13  
14 people globally reported to have uncorrected presbyopia [5] have 'felt need' as a barrier  
15  
16 for near correction, the target for service delivery will be considerably decreased to 246  
17  
18 million. It is essential to consider these barriers for planning and setting of targets for  
19  
20 refraction services. Planning based on the total need as estimated by a service provider,  
21  
22 instead of patient 'perceived need' is bound to over-estimate the target by a fair margin.  
23  
24 'Felt need' drives the demand for presbyopic spectacles. In this study about 58% of the  
25  
26 subjects had no formal education and 56% were involved in unskilled labor. It may be  
27  
28 inferred that in regions where the level of education is high, the felt need may be higher  
29  
30 and similarly in areas where a majority of people are engaged in near work related  
31  
32 occupations, the high felt need may be seen. Even though the study did not include severe  
33  
34 presbyopes and was conducted in rural areas, the estimates may be skewed but could  
35  
36 have a considerable effect in similar populations.  
37  
38  
39  
40  
41  
42  
43  
44

45  
46 Even though the lack of felt need is the major barrier, other issues related to affordability  
47  
48 and availability is still important. For instance, if services are easily available and  
49  
50 affordable, the effort an individual has to make to get a pair of spectacles is less and this  
51  
52 may increase the uptake of services. This uptake may be low if the individual has to  
53  
54  
55  
56  
57  
58  
59  
60



*Barriers to utilisation of refraction of services*

1  
2  
3 travel long distances and spend more money on direct or indirect costs to procure the  
4  
5 same pair of spectacles.  
6  
7  
8  
9

10 The recent strategy of provision of eye care services, mainly refraction services through  
11 permanent facilities called vision centres, is a step in right direction to address several  
12 barriers reported in this paper. [21, 22] Together, the data on prevalence and  
13 understanding and addressing the barriers for the uptake of services are critical to the  
14 planning of refractive error services to achieve the goals of VISION 2020 initiative.  
15  
16  
17  
18  
19  
20  
21  
22  
23  
24  
25  
26  
27  
28  
29  
30  
31  
32  
33  
34  
35  
36  
37  
38  
39  
40  
41  
42  
43  
44  
45  
46  
47  
48  
49  
50  
51  
52  
53  
54  
55  
56  
57  
58  
59  
60

**FUNDING SUPPORT AND CONTRIBUTORSHIP STATEMENT**

The financial support for this study was provided in part by the Vision Co-operative Research Centre, Australia as part of Srinivas Marmamula's doctoral program and by Hyderabad Eye Research Foundation. Dr. Gullapalli N Rao and Prof. Jill Keefe supervised the project and provided technical inputs. Dr. Usha Raman reviewed the earlier drafts of the manuscripts and provided intellectual inputs.

**ACKNOWLEDGEMENTS**

The authors thank the volunteers who have participated in the study. The authors also thank the vision technicians, S Narasiah and G Bhaskar for their assistance in data collection.

**COMPETING INTERESTS:** None

**REFERENCES**

1. Resnikoff, S., D. Pascolini, S.P. Mariotti, et al., *Global magnitude of visual impairment caused by uncorrected refractive errors in 2004*. Bull World Health Organ, 2008. **86**(1): p. 63-70.
2. Dandona, L., R. Dandona, M. Srinivas, et al., *Blindness in the Indian state of Andhra Pradesh*. Invest Ophthalmol Vis Sci, 2001. **42**(5): p. 908-16.

*Barriers to utilisation of refraction of services*

3. Dandona, R., L. Dandona, M. Srinivas, et al., *Moderate visual impairment in India: the Andhra Pradesh Eye Disease Study*. Br J Ophthalmol, 2002. **86**(4): p. 373-7.
4. WHO, *Elimination of avoidable visual disability due to refractive errors*, in *WHO/PBL/00.79*. 2001, World Health Organization: Geneva.
5. Holden, B.A., T.R. Fricke, S.M. Ho, et al., *Global vision impairment due to uncorrected presbyopia*. Arch Ophthalmol, 2008. **126**(12): p. 1731-9.
6. Burke, A.G., I. Patel, B. Munoz, et al., *Population-based study of presbyopia in rural Tanzania*. Ophthalmology, 2006. **113**(5): p. 723-7.
7. Patel, I., B. Munoz, A.G. Burke, et al., *Impact of presbyopia on quality of life in a rural African setting*. Ophthalmology, 2006. **113**(5): p. 728-34.
8. Lu, Q., W. He, G.V. Murthy, et al., *Presbyopia and near-vision impairment in rural northern china*. Invest Ophthalmol Vis Sci. **52**(5): p. 2300-5.
9. Marmamula, S., J.E. Keeffe, and G.N. Rao, *Uncorrected refractive errors, presbyopia and spectacle coverage: results from a rapid assessment of refractive error survey*. Ophthalmic Epidemiol, 2009. **16**(5): p. 269-74.
10. Dandona, R., L. Dandona, T.J. Naduvilath, et al., *Design of a population-based study of visual impairment in India: The Andhra Pradesh Eye Disease Study*. Indian J Ophthalmol, 1997. **45**(4): p. 251-7.
11. Dandona, R. and L. Dandona, *Review of findings of the Andhra Pradesh Eye Disease Study: policy implications for eye-care services*. Indian J Ophthalmol, 2001. **49**(4): p. 215-34.

*Barriers to utilisation of refraction of services*

- 1  
2  
3  
4  
5  
6  
7  
8  
9  
10  
11  
12  
13  
14  
15  
16  
17  
18  
19  
20  
21  
22  
23  
24  
25  
26  
27  
28  
29  
30  
31  
32  
33  
34  
35  
36  
37  
38  
39  
40  
41  
42  
43  
44  
45  
46  
47  
48  
49  
50  
51  
52  
53  
54  
55  
56  
57  
58  
59  
60
12. Dandona, R., L. Dandona, T.J. Naduvilath, et al., *Utilisation of eyecare services in an urban population in southern India: the Andhra Pradesh eye disease study*. Br J Ophthalmol, 2000. **84**(1): p. 22-7.
13. Kovai, V., S. Krishnaiah, B.R. Shamanna, et al., *Barriers to accessing eye care services among visually impaired populations in rural Andhra Pradesh, South India*. Indian J Ophthalmol, 2007. **55**(5): p. 365-71.
14. Nirmalan, P.K., J. Katz, A.L. Robin, et al., *Utilisation of eye care services in rural south India: the Aravind Comprehensive Eye Survey*. Br J Ophthalmol, 2004. **88**(10): p. 1237-41.
15. Hodges, L.E. and M.L. Berk, *Unmet need for eyeglasses: results from the 1994 Robert Wood Johnson Access to Care Survey*. J Am Optom Assoc, 1999. **70**(4): p. 261-5.
16. Ramke, J., R. du Toit, A. Palagyi, et al., *Correction of refractive error and presbyopia in Timor-Leste*. Br J Ophthalmol, 2007. **91**(7): p. 860-6.
17. Yasmin, S. and H. Minto, *Community perceptions of refractive errors in Pakistan*. Community Eye Health, 2007. **20**(63): p. 52-3.
18. Dandona, R., L. Dandona, V. Kovai, et al., *Population-based study of spectacles use in southern India*. Indian J Ophthalmol, 2002. **50**(2): p. 145-55.
19. Sherwin, J.C., J.E. Keefe, H. Kuper, et al., *Functional presbyopia in a rural Kenyan population: the unmet presbyopic need*. Clin Experiment Ophthalmol, 2008. **36**(3): p. 245-51.

*Barriers to utilisation of refraction of services*

- 1  
2  
3  
4  
5  
6  
7  
8  
9  
10  
11  
12  
13  
14  
15  
16  
17  
18  
19  
20  
21  
22  
23  
24  
25  
26  
27  
28  
29  
30  
31  
32  
33  
34  
35  
36  
37  
38  
39  
40  
41  
42  
43  
44  
45  
46  
47  
48  
49  
50  
51  
52  
53  
54  
55  
56  
57  
58  
59  
60
20. Nirmalan, P.K., S. Krishnaiah, B.R. Shamanna, et al., *A population-based assessment of presbyopia in the state of Andhra Pradesh, south India: the Andhra Pradesh Eye Disease Study*. Invest Ophthalmol Vis Sci, 2006. **47**(6): p. 2324-8.
21. Khanna, R., U. Raman, and G.N. Rao, *Blindness and poverty in India: the way forward*. Clin Exp Optom, 2007. **90**(6): p. 406-14.
22. Rao, G.N., *An infrastructure model for the implementation of VISION 2020: The Right to Sight*. Can J Ophthalmol 2004. **39**: p. 589–594.

STROBE 2007 (v4) Statement—Checklist of items that should be included in reports of cross-sectional studies

| Section/Topic                | Item # | Recommendation                                                                                                                                                                       | Reported on page # |
|------------------------------|--------|--------------------------------------------------------------------------------------------------------------------------------------------------------------------------------------|--------------------|
| Title and abstract           | 1      | (a) Indicate the study’s design with a commonly used term in the title or the abstract                                                                                               | 2                  |
|                              |        | (b) Provide in the abstract an informative and balanced summary of what was done and what was found                                                                                  | 2                  |
| <b>Introduction</b>          |        |                                                                                                                                                                                      |                    |
| Background/rationale         | 2      | Explain the scientific background and rationale for the investigation being reported                                                                                                 | 3                  |
| Objectives                   | 3      | State specific objectives, including any prespecified hypotheses                                                                                                                     | 4                  |
| <b>Methods</b>               |        |                                                                                                                                                                                      |                    |
| Study design                 | 4      | Present key elements of study design early in the paper                                                                                                                              | 3                  |
| Setting                      | 5      | Describe the setting, locations, and relevant dates, including periods of recruitment, exposure, follow-up, and data collection                                                      | 3                  |
| Participants                 | 6      | (a) Give the eligibility criteria, and the sources and methods of selection of participants                                                                                          | 3                  |
| Variables                    | 7      | Clearly define all outcomes, exposures, predictors, potential confounders, and effect modifiers. Give diagnostic criteria, if applicable                                             | 6                  |
| Data sources/<br>measurement | 8*     | For each variable of interest, give sources of data and details of methods of assessment (measurement). Describe comparability of assessment methods if there is more than one group |                    |
| Bias                         | 9      | Describe any efforts to address potential sources of bias                                                                                                                            |                    |
| Study size                   | 10     | Explain how the study size was arrived at                                                                                                                                            | 5                  |
| Quantitative variables       | 11     | Explain how quantitative variables were handled in the analyses. If applicable, describe which groupings were chosen and why                                                         |                    |
| Statistical methods          | 12     | (a) Describe all statistical methods, including those used to control for confounding                                                                                                | 5                  |
|                              |        | (b) Describe any methods used to examine subgroups and interactions                                                                                                                  |                    |
|                              |        | (c) Explain how missing data were addressed                                                                                                                                          |                    |
|                              |        | (d) If applicable, describe analytical methods taking account of sampling strategy                                                                                                   |                    |
|                              |        | (e) Describe any sensitivity analyses                                                                                                                                                |                    |
| <b>Results</b>               |        |                                                                                                                                                                                      |                    |

|                          |     |                                                                                                                                                                                                                                                                                                                                                                                                               |    |
|--------------------------|-----|---------------------------------------------------------------------------------------------------------------------------------------------------------------------------------------------------------------------------------------------------------------------------------------------------------------------------------------------------------------------------------------------------------------|----|
| Participants             | 13* | (a) Report numbers of individuals at each stage of study—eg numbers potentially eligible, examined for eligibility, confirmed eligible, included in the study, completing follow-up, and analysed<br>(b) Give reasons for non-participation at each stage<br>(c) Consider use of a flow diagram                                                                                                               | 8  |
| Descriptive data         | 14* | (a) Give characteristics of study participants (eg demographic, clinical, social) and information on exposures and potential confounders<br>(b) Indicate number of participants with missing data for each variable of interest                                                                                                                                                                               | 8  |
| Outcome data             | 15* | Report numbers of outcome events or summary measures                                                                                                                                                                                                                                                                                                                                                          |    |
| Main results             | 16  | (a) Give unadjusted estimates and, if applicable, confounder-adjusted estimates and their precision (eg, 95% confidence interval). Make clear which confounders were adjusted for and why they were included<br>(b) Report category boundaries when continuous variables were categorized<br>(c) If relevant, consider translating estimates of relative risk into absolute risk for a meaningful time period |    |
| Other analyses           | 17  | Report other analyses done—eg analyses of subgroups and interactions, and sensitivity analyses                                                                                                                                                                                                                                                                                                                |    |
| <b>Discussion</b>        |     |                                                                                                                                                                                                                                                                                                                                                                                                               |    |
| Key results              | 18  | Summarise key results with reference to study objectives                                                                                                                                                                                                                                                                                                                                                      | 12 |
| Limitations              | 19  | Discuss limitations of the study, taking into account sources of potential bias or imprecision. Discuss both direction and magnitude of any potential bias                                                                                                                                                                                                                                                    | 15 |
| Interpretation           | 20  | Give a cautious overall interpretation of results considering objectives, limitations, multiplicity of analyses, results from similar studies, and other relevant evidence                                                                                                                                                                                                                                    | 15 |
| Generalisability         | 21  | Discuss the generalisability (external validity) of the study results                                                                                                                                                                                                                                                                                                                                         | 15 |
| <b>Other information</b> |     |                                                                                                                                                                                                                                                                                                                                                                                                               |    |
| Funding                  | 22  | Give the source of funding and the role of the funders for the present study and, if applicable, for the original study on which the present article is based                                                                                                                                                                                                                                                 | 17 |

\*Give information separately for cases and controls in case-control studies and, if applicable, for exposed and unexposed groups in cohort and cross-sectional studies.

**Note:** An Explanation and Elaboration article discusses each checklist item and gives methodological background and published examples of transparent reporting. The STROBE checklist is best used in conjunction with this article (freely available on the Web sites of PLoS Medicine at <http://www.plosmedicine.org/>, Annals of Internal Medicine at <http://www.annals.org/>, and Epidemiology at <http://www.epidem.com/>). Information on the STROBE Initiative is available at [www.strobe-statement.org](http://www.strobe-statement.org).

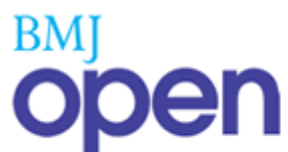

**Barriers to Utilisation of Refraction Services in South India:  
Rapid Assessment of Refractive Errors (RARE) Study**

|                                 |                                                                                                                                                                                                             |
|---------------------------------|-------------------------------------------------------------------------------------------------------------------------------------------------------------------------------------------------------------|
| Journal:                        | <i>BMJ Open</i>                                                                                                                                                                                             |
| Manuscript ID:                  | bmjopen-2011-000172.R1                                                                                                                                                                                      |
| Article Type:                   | Research                                                                                                                                                                                                    |
| Date Submitted by the Author:   | 09-Jun-2011                                                                                                                                                                                                 |
| Complete List of Authors:       | Marmamula, Srinivas; L V Prasad Eye Institute, ICARE<br>Keeffe, Jill; Centre for Eye Reseach Australia<br>Raman, Usha; L V Prasad Eye Institute, Communications<br>Rao, Gullapalli; LV Prasad Eye Institute |
| <b>Primary Subject Heading</b>: | Public health                                                                                                                                                                                               |
| Keywords:                       | Public health < INFECTIOUS DISEASES, Refractive Errors , Cataract and refractive surgery < OPHTHALMOLOGY                                                                                                    |
|                                 |                                                                                                                                                                                                             |

SCHOLARONE™  
Manuscripts

only



**Barriers to Utilisation of Refraction Services in South India:  
Rapid Assessment of Refractive Errors (RARE) Study**

Srinivas Marmamula, MSc<sup>1,2,5</sup>, Jill E Keeffe, PhD<sup>2,3</sup>, Usha Raman, PhD<sup>1,2,4</sup>

Gullapalli N Rao, MD<sup>1,2</sup>

<sup>1</sup> International Centre for Advancement of Rural Eye care, L V Prasad Eye Institute,  
Hyderabad, India

<sup>2</sup> Vision Cooperative Research Centre, Sydney, Australia

<sup>3</sup> Centre for Eye Research Australia, University of Melbourne, Melbourne, Australia

<sup>4</sup> Centre for Communication, L V Prasad Eye Institute, Hyderabad, India

<sup>5</sup> Bausch & Lomb School of Optometry, L V Prasad Eye Institute, Hyderabad, India

Address for correspondence:

Srinivas Marmamula

International Centre for Advancement of Rural Eye care

L V Prasad Eye Institute, Banjara Hills

Hyderabad 500 034, India

Phone: 91 40 3061 5613

Email: sriptom@lvpei.org

Running title: Barriers to Utilisation of Refraction Services

Key words: Barriers, presbyopia, rapid assessment, uncorrected refractive errors,

Abstract: 187 words; Text: 2754 words; Tables: 3; References: 22

Deleted: 6

Deleted: 480

*Barriers to utilisation of refraction of services*

1  
2  
3  
4  
5  
6  
7  
8  
9  
10  
11  
12  
13  
14  
15  
16  
17  
18  
19  
20  
21  
22  
23  
24  
25  
26  
27  
28  
29  
30  
31  
32  
33  
34  
35  
36  
37  
38  
39  
40  
41  
42  
43  
44  
45  
46  
47  
48  
49  
50  
51  
52  
53  
54  
55  
56  
57  
58  
59  
60

**Aim:** To assess the barriers to the uptake of refraction services in the age group of 15–49 years in rural Andhra Pradesh, India.

**Methods:** A population-based cross-sectional study was conducted using cluster random sampling to enumerate 3,300 individuals from 55 clusters. A validated questionnaire was used to elicit information on barriers to utilization of services among individuals with uncorrected refractive error (presenting visual acuity (VA)  $<6/12$  but improving to  $\geq 6/12$  on using a pinhole) and presbyopia (binocular near vision  $<N8$  in individuals aged  $>35$  years with binocular distance VA of  $\geq 6/12$ ).

**Results:** 3095 (94%) were available for examination. Those with uncorrected refractive errors cited affordability as the main barrier to the uptake of eye care services. Among people with uncorrected presbyopia, lack of “felt need” was the leading barrier.

**Conclusion:** The barriers that were ‘relatively easy to change’ were reported by those with uncorrected refractive errors in contrast to ‘difficult to change’ barriers reported by those with uncorrected presbyopia. Together with the data on prevalence and an understanding of the barriers for the uptake of services are critical to the planning of refractive error services.

**ARTICLE SUMMARY****Article focus**

- Several barriers limit the uptake of refraction services
- Understanding and addressing the barriers is essential to tackle the problem of uncorrected refractive errors and presbyopia

**Key messages**

- Affordability is the important barrier among individuals with uncorrected refractive errors
- Lack of felt need and awareness are important barriers reported by people with uncorrected presbyopia

**Strengths and limitations**

- Large sample size, a good response rate and sound methodology are the strengths of the study
- The study did not include individuals aged 50 and older and hence the results cannot be generalized to the general population.

**INTRODUCTION**

Recent global estimates reveal that 153 million people have uncorrected refractive errors in addition to the 161 million people who are visually impaired due to other causes. [1]

Despite the availability of a simple remedy, uncorrected refractive errors are responsible for 16% of the blindness [2] and 46% of the visual impairment across all age groups in the Indian state of Andhra Pradesh. [3] Addressing the huge need for correction of uncorrected refractive error is one of the priorities of the global initiative VISION 2020: The Right to Sight. [4]

Deleted: cause

Uncorrected presbyopia is increasingly recognized as a major problem across the world. Recent estimates by Holden et al. [5] have revealed that nearly 410 million people have near visual impairment due to uncorrected presbyopia. Several studies have underscored the impact of uncorrected presbyopia on the quality of life in individuals in rural settings. [6-8] Recent studies make it clear that the impact of uncorrected presbyopia is not limited to literate populations living in urban areas.

Given the very limited data specifically focused on uncorrected refractive errors and presbyopia, especially in India, further research is necessitated on barriers to the uptake of services. Understanding the perceived barriers is a prerequisite to formulating effective strategies to provide efficient and effective eye care. In this paper, we discuss the patient-reported barriers to the uptake of refraction services among individuals aged 15 to 49 years living in rural areas of the South Indian state of Andhra Pradesh.

## MATERIALS AND METHODS

The instrument that was used to collect information on barriers was a part of Rapid Assessment of Refractive Errors (RARE) survey that was conducted in Mahbubnagar district in Andhra Pradesh, India. [9] Five administrative divisions (mandals) in this district each consisting of 20-30 villages were selected and divided into clusters of almost equal population size. In total, 55 clusters were randomly selected using random numbers generated by an MS Excel worksheet and attempts were made to examine 60 subjects from each cluster to obtain the sample size needed.

Deleted: .[

Deleted: The five

### Study procedures

The survey team consisting of a vision technician (a high school graduate with one year's training in primary eye health) and two community eye health workers visited subjects in their homes. Oral informed consent was sought from each subject after explaining the study and survey procedures. In the case of subjects aged below 18 years, permission was obtained from either the parent or guardian.

Presenting visual acuity (VA) in each eye was measured using a logMAR chart at a distance of 4 meters. Subjects with VA < 6/12 (0.3 logMAR) in either eye were re-assessed using a multiple pinhole occluder. Near vision was assessed binocularly using the N notation chart at the customary working distance (usual range 33–35 cm) for each individual.

*Barriers to utilisation of refraction of services*

Demographic information including education level, occupation, current and previous use of spectacles was collected through a brief personal interview. The questionnaire used in this study had earlier been validated and used in the Andhra Pradesh Eye Disease Study (APEDS) [10]. The response options in the questionnaire were derived from focus group discussions held in the community [11] and were used in previous studies [12, 13]. The questionnaire consisted of a list of 15 barriers. The questionnaire was administered in the regional languages (Telugu or Hindi) after the eye exam to those people with uncorrected refractive error and/ or uncorrected presbyopia. If the response/s reported by the subject was on the list, then it was marked. In cases, where one or more barriers reported were not in the list, they were fully specified under 'others'. If an individual gave more than one reason, all responses were marked and the individual was asked to select the most important.

Deleted: that was

Deleted: )

Deleted: was used to in this study

Deleted: that was

Deleted: available in

Deleted: specify which was

The barriers were then grouped under themes 1) Lack of awareness if the individual was unaware of uncorrected refractive errors or presbyopia; 2) Lack of felt need if the individual was aware of uncorrected refractive errors or presbyopia but had never felt the need for consultation; 3) Lack of affordability if the individual was aware uncorrected refractive error and presbyopia but felt they could not afford the cost of eye exam and/or spectacles; 4) Lack of accessibility if the individual stated that services were too far away or difficult to reach ; 5) Personal barrier if the individual mentioned other health related problems, fear, or others such as emotional and psychological issues.

**Study definitions**

A barrier was defined as the reason for not accessing an eye care facility by persons who could benefit from spectacles. Visual impairment was defined as binocular presenting VA  $<6/12$ . Uncorrected refractive error was defined as presenting VA  $<6/12$  but improving to  $\geq 6/12$  on using a pinhole. Uncorrected presbyopia was defined as binocular near vision  $<N8$  at the subject's customary working distance in subjects aged  $>35$  years and who had binocular presenting distance VA of  $6/12$  (logMAR 0.3) or better. It was classified as mild (presenting near vision  $<N8$  to  $N10$ ), moderate (worse than  $N10$  to  $N18$ ) and severe ( $<N18$ ).

Data management and analysis was conducted using SPSS 16.0 (SPSS Inc., Chicago, IL) software. All persons with visual acuity  $<6/12$  in the better eye were referred to the nearest eye care facility for management. The survey was conducted in accordance with ethical principles and adhered to the Declaration of Helsinki. This study was carried out during February–May 2008. The study protocol was reviewed and approved by the Institutional Review Board (IRB) of L V Prasad Eye Institute, Hyderabad, India.

Deleted: and

**RESULTS**

Of the 3,300 subjects enumerated from 55 clusters, the data were available from 3,095 subjects (94%) for analysis. The mean age of males and females were similar ( $p=0.34$ ) and over half the participants had no education. The participants' characteristics are presented in Table 1.

**Table 1: Participants' Characteristics (n=3095)**

|                        | n (%)       |
|------------------------|-------------|
| <b>Age group (yrs)</b> |             |
| 15 – 29                | 1540 (49.8) |
| 30 – 39                | 739 (23.9)  |
| 40 – 49                | 816 (26.4)  |
| <b>Gender</b>          |             |
| Male                   | 1626 (52.5) |
| Female                 | 1469 (47.5) |
| <b>Education level</b> |             |
| No Education           | 1794 (58.0) |
| School education       | 1095 (35.4) |
| University education   | 206 (6.7)   |
| <b>Occupation</b>      |             |
| Unskilled labor        | 1722 (55.6) |
| Home duties            | 557 (18.0)  |



*Barriers to utilisation of refraction of services*

|                    |            |
|--------------------|------------|
| Student            | 392 (12.7) |
| Skilled jobs       | 227 (7.3)  |
| Clerical /business | 197 (6.4)  |

**Uncorrected Refractive Errors**

Refractive errors were present in either eye of 187 subjects (age and gender adjusted prevalence of 4.8%, 95% CI, 4.0-5.5%) and the condition was uncorrected in 139 subjects. Of these 139 individuals, 30.9% (43 subjects) cited an economic reason as a barrier to the uptake of services and 23.0% (32 subjects) cited a lack of 'felt need' for the refractive correction. Another 16.5% (23) persons cited 'lack of access' as the barrier for uptake of services (Table 2). The barriers were similar among the individuals who had uncorrected refractive errors in one or both eyes (Table 2). In 88 (2.8%) subjects, uncorrected refractive errors were present in the better eye and were the cause of visual impairment. An economic reason followed by 'lack of access' were reported as the most important barriers in this group (Table 2).

Deleted: it

Deleted: and

Out of 139 subjects with uncorrected refractive errors in either eye, 63 individuals gave more than one response. Personal reasons and lack of 'felt need' were the most common additional barriers. Similar barriers were reported by 45 individuals with uncorrected refractive errors in the better eye and who gave more than one response (Table 2).

Deleted: These

Deleted: similar in

## Barriers to utilisation of refraction of services

Table 2: Barriers and Uncorrected Refractive Errors (URE) in either eye or better

Deleted: ¶

¶  
¶  
¶  
¶

## Eye

|                   | URE Either eye         |                   | URE in better eye      |                   |
|-------------------|------------------------|-------------------|------------------------|-------------------|
|                   | n (%)                  | n (%)             | n (%)                  | n (%)             |
|                   | Most important barrier | Second barrier    | Most important barrier | Second barrier    |
| Economic reasons  | 43 (30.9)              | 8 (12.7)          | 32 (36.4)              | 6 (13.3)          |
| Lack of felt need | 32 (23.0)              | 11 (17.5)         | 21 (23.9)              | 7 (15.6)          |
| Lack of access    | 23 (16.5)              | 7 (11.1)          | 12 (13.6)              | 4 (8.9)           |
| Personal reasons  | 23 (16.5)              | 29 (46.0)         | 12 (13.6)              | 23 (51.1)         |
| Lack of awareness | 18 (12.9)              | 8 (12.7)          | 11 (12.5)              | 5 (11.1)          |
| <b>Total</b>      | <b>139 (100.0)</b>     | <b>63 (100.0)</b> | <b>88 (100.0)</b>      | <b>45 (100.0)</b> |

**Uncorrected presbyopia**

Among the 974 subjects aged above 35 years, presbyopia was present in 616 (63.2%;

95% CI, 60.2-66.2) subjects. It was uncorrected in 512/616 (83.1%) subjects. Lack of

'felt need' was the most important barrier to the uptake of services in 46.5% (238) of

individuals. Lack of 'awareness' was reported by 16% (82) participants. 'Lack of access',

economic and personal reasons were reported by 13%, 12.5% and 11.7% respectively

(Table 3).

Deleted: ibility

*Barriers to utilisation of refraction of services*

The lack of 'felt need' was the main barrier irrespective of severity of uncorrected presbyopia: 46.5% (124 subjects) with mild and 44.4% (139 subjects) with moderate presbyopia (Table 3). 'Lack of accessibility' to services as a barrier was higher among the subjects with moderate presbyopia compared to those with mild presbyopia (16% versus 9%, chi square test,  $p=0.009$ ). Lack of awareness was higher in mild presbyopes compared to moderate presbyopes (23% and 10% respectively, chi square,  $p=0.001$ ). Of 512 subjects with uncorrected presbyopia, 201 individuals gave more than one response. Lack of 'felt need' and personal reasons were the leading barriers in this group (Table 3).

**Table 3: Barriers and uncorrected presbyopia**

|                   | Most important barrier |                     |                    | Second barrier     |
|-------------------|------------------------|---------------------|--------------------|--------------------|
|                   | Mild presbyopia        | Moderate Presbyopia | Total Presbyopia*  | Total Presbyopia*  |
|                   | n (%)                  | n (%)               | n (%)              | n (%)              |
| Lack of felt need | 117 (50.2)             | 120 (43.2)          | 237 (46.4)         | 50 (24.9)          |
| Lack of awareness | 53 (22.7)              | 29 (10.4)           | 82 (16.0)          | 40 (19.9)          |
| Economics         | 22 (9.4)               | 42 (15.1)           | 64 (12.5)          | 28 (13.9)          |
| Accessibility     | 21 (9.0)               | 47 (16.9)           | 68 (13.3)          | 39 (19.4)          |
| Personal reasons  | 20 (8.6)               | 40 (14.4)           | 60 (11.7)          | 44 (21.9)          |
|                   | <b>233 (100.0)</b>     | <b>278 (100.0)</b>  | <b>511 (100.0)</b> | <b>201 (100.0)</b> |

\* One subject with severe presbyopia was excluded from analysis

## DISCUSSION

The utilization of refraction services is just as important as provision of services, if we were to address the burden of uncorrected refractive errors and presbyopia. To our knowledge, this is first study to report barriers to the uptake of refraction services from India that has implications for the planning and implementation of eye care services. The barriers reported by the individuals studied can be categorized as “relatively easy to change” and “difficult to change”. For example, economic barriers and accessibility related barriers may be categorized as relatively easy to change. The initiative to change this is with the service provider, by making services more affordable and more easily reachable in terms of location. Lack of ‘felt need’, awareness and personal reasons such as fear and other competing commitments are more difficult to change and a sustained long term effort is required both at the individual level and by the service provider to create an impact. Related to these personal barriers are issues such as differential access among women and the elderly, due to cultural barriers or because of a lack of supportive family structure. Though these were not specifically included in the list, they are definitely barriers to consider and perhaps to some extent overlap with other personal barriers.

Deleted: such

Deleted: for

Deleted: can

Deleted: have

Deleted: providing

Deleted: can

For uncorrected refractive errors, the most important barriers are ‘easy to change’ but importantly almost half of the participants (63/139) reported more than one barrier, most of which were in the ‘difficult to change’ category. In contrast to this, ‘difficult to change’ are the leading barriers for uncorrected presbyopia. Even among those reporting a second barrier, ‘difficult to change’ barriers are the most important. These findings

Deleted: a

Deleted: also

*Barriers to utilisation of refraction of services*

1  
2 reflect on the need for a rigorous campaign to address the benefits of correction of  
3  
4 presbyopia.  
5  
6

7  
8 Refraction services are provided mainly at primary and to some extent at secondary level  
9  
10 of eye care in India. The study highlights economic reason as the leading barrier for  
11  
12 uptake of services for correction of refractive errors and lack of 'felt need' as the leading  
13  
14 barrier for uncorrected presbyopia. Economic barrier includes cost of a consultation and  
15  
16 the cost of spectacles. In the context of the study, refraction services are often provided  
17  
18 free of cost, and a patient needs to pay for spectacles. Hence the economic barrier is  
19  
20 mainly related to the cost of spectacles. . Several studies from developing countries,  
21  
22 including those by Nirmalan and colleagues from South India, [14] and Kovai and  
23  
24 colleagues who found that 37% of those who noticed a change in vision did not utilize  
25  
26 eye care services for economic reasons in rural Andhra Pradesh [13] have identified  
27  
28 economic reason as an important barrier for uptake of services. [15-17]  
29  
30

31  
32 Provision of spectacles at a low cost and an affordable pricing system will address the  
33  
34 issue of uncorrected refractive errors and presbyopia. If the cost of spectacles is high, it  
35  
36 may be unaffordable to many people. Hence, the pricing system should reflect the  
37  
38 purchasing capacity of the majority in the community so as to encourage the sale of  
39  
40 spectacles. Anecdotal evidence in these rural communities suggests that an individual  
41  
42 may be able to afford two days' wages (approximately 150 to 200 Indian rupees or USD  
43  
44 4 to 5) to buy a pair spectacles.  
45  
46  
47  
48  
49  
50  
51  
52  
53  
54  
55  
56  
57  
58  
59  
60

Deleted: by

*Barriers to utilisation of refraction of services*

1  
2  
3 | In addition to affordability, the quality, comfort, endurance and accuracy of the  
4 prescription are equally important. Dandona et al. [18] found that nearly one-third of the  
5 subjects with correctable visual impairment, - discontinued the use of spectacles, either  
6  
7 because they felt the prescription was wrong or that the spectacles were uncomfortable.  
8  
9

Deleted: Besides

Deleted: impairment,

10 There are similar reports from Timor-Leste. [16]

11  
12  
13  
14 In the current study, a quarter of those with uncorrected refractive errors did not feel the  
15 need for correction possibly because they did not face problems in their day-to-day tasks.

16  
17 Although other barriers cannot be ignored, the lack of felt need for correction of  
18 refractive errors is important in considering targets for the elimination of uncorrected  
19 refractive errors. Setting targets purely based on prevalence estimates from  
20 epidemiological studies, without discounting for those who do not feel the need for  
21 correction, may be difficult to achieve. Further, it is useful to understand this aspect in

Deleted: disability due to

22  
23 greater depth, by probing, for instance, the social and cultural factors that lead to  
24 someone not “feeling” the need for vision correction, or how “good vision” is understood  
25 by different groups of people.  
26  
27  
28  
29  
30  
31  
32  
33  
34  
35

36  
37 Only a few studies have referred to the prevalence and impact of presbyopia from the  
38 developing world. [6-8] In the present study, ‘lack of felt need’ followed by ‘lack of  
39 awareness’ is a major barrier to the uptake of services, among people with presbyopia.  
40 Together they accounted for over 60% of the responses. Sherwin et al concluded that a  
41 quarter of the subjects with presbyopia in a rural Kenyan population did not consider  
42 their condition to be important. [19] Nirmalan et al. reported that about 24% of the  
43  
44  
45  
46  
47  
48  
49  
50

*Barriers to utilisation of refraction of services*

1  
2 subjects did not consider presbyopia to be a serious problem and another 24% of them  
3  
4 felt that they were able to see adequately. [20]  
5  
6  
7

8 Lack of awareness was cited frequently by the presbyopic population in the current study,  
9  
10 which did not include individuals aged 50 years and above as in other studies in  
11  
12 presbyopia. Here, this was significantly higher in those with mild presbyopia than the  
13  
14 moderate presbyopia group. Lack of access is reported to be more common for those with  
15  
16 moderate presbyopia compared to mild presbyopia. As near vision decreases to a level  
17  
18 where it affects daily routine, people seem more eager to use services and at this point  
19  
20 accessibility becomes a crucial factor.  
21  
22  
23

**Deleted:** in is another important barrier that

24  
25 Extrapolating the results from this study, even if we consider a conservative estimate of  
26  
27 40% of the 410 million people globally reported to have uncorrected presbyopia [5] have  
28  
29 'felt need' as a barrier for near correction, the target for service delivery will decrease  
30  
31 considerably to 246 million. It is essential to consider these barriers for planning and  
32  
33 setting of targets for refraction services. Planning based on the total need as estimated by  
34  
35 a service provider, instead of patient 'perceived need' is bound to over-estimate the target  
36  
37 by a fair margin. 'Felt need' drives the demand for presbyopic spectacles. In this study  
38  
39 about 58% of the subjects had no formal education and 56% were involved in unskilled  
40  
41 labor. It may be inferred that in regions where the level of education is high, the felt need  
42  
43 may be higher and similarly in areas where a majority of people are engaged in near work  
44  
45 related occupations, the high felt need may be seen. Even though the study did not  
46  
47  
48  
49  
50  
51  
52  
53  
54  
55  
56  
57  
58  
59  
60

**Deleted:** The lack of 'felt need' was reported by over 46% of all barriers.

**Deleted:** be

**Deleted:** decreased

*Barriers to utilisation of refraction of services*

1  
2 include severe presbyopes and was conducted in rural areas, the estimates may be skewed  
3  
4 but could have a considerable effect in similar populations.  
5  
6  
7

8 Other issues related to affordability and availability are also important. For instance, if  
9  
10 services are easily available and affordable, the effort an individual has to make to get a  
11  
12 pair of spectacles is less and this may increase the uptake of services. This uptake may be  
13  
14 low if the individual has to travel long distances and spend more money on direct or  
15  
16 indirect costs to procure the same pair of spectacles. It may also be influenced by the  
17  
18 dynamics in the family, culture and community, for instance, gender has been cited as a  
19  
20 barrier in general to accessibility of services. [21,22] Individuals who cannot draw upon  
21  
22 the support of family or caregivers to accompany them to the clinic or to provide related  
23  
24 assistance may be less likely to act upon a need when it is felt.  
25  
26  
27

Deleted: Even though the lack of felt need is the major barrier, o

Deleted: is

Deleted: still

28  
29 The recent strategy of provision of eye care services, mainly refraction services through  
30  
31 permanent facilities called vision centres, is a step in right direction to address several  
32  
33 barriers reported in this paper. [23, 24] Vision centres are primary eye care units staffed  
34  
35 by a “vision technician”, located strategically to maximize access to underserved  
36  
37 communities. Each vision centre is designed to cater the primary eye care needs of  
38  
39 50,000 population and forms three core functions (3 R’s) 1) Recognize common blinding  
40  
41 conditions, 2) Refraction and dispensing of spectacles at a low cost and 3) referral  
42  
43 services, if a patient needs a further eye examination for medical and surgical  
44  
45 intervention.  
46  
47  
48  
49  
50

Deleted: 1

Deleted: 2



1  
2  
3 To conclude, the results of the study, using RARE methodology revealed several barriers  
4 to utilisation of refraction services in Mahbubnagar district in Andhra Pradesh, India.

5  
6 Together, the data on prevalence and understanding and addressing the barriers for the  
7  
8 uptake of services are critical to the planning of refractive error services in this region  
9  
10 and can contribute to achieve the overall goals of VISION 2020 initiative.  
11  
12

#### 13 14 15 16 17 18 19 20 21 22 23 24 25 26 27 28 29 30 31 32 33 34 35 36 37 38 39 **FUNDING SUPPORT AND CONTRIBUTORSHIP STATEMENT**

40  
41 The financial support for this study was provided in part by the Vision Co-operative  
42  
43 Research Centre, Australia as part of Srinivas Marmamula's doctoral program and by  
44  
45 Hyderabad Eye Research Foundation. Dr. Gullapalli N Rao and Prof.Jill Keefe  
46  
47  
48  
49  
50

*Barriers to utilisation of refraction of services*

1 supervised the project and provided technical inputs. Dr.Usha Raman reviewed the earlier  
2  
3 drafts of the manuscripts and provided inputs.  
4  
5  
6  
7

Deleted: intellectual

**ACKNOWLEDGEMENTS**

8 The authors thank the volunteers who have participated in the study. The authors also  
9  
10  
11 thank the vision technicians, S Narasiah and G Bhaskar for their assistance in data  
12  
13  
14 collection.  
15  
16  
17

Deleted: , S

18 **COMPETING INTERESTS:** None  
19  
20  
21  
22  
23

**REFERENCES**

- 24  
25  
26 1. Resnikoff, S., Pascolini, D., Mariotti, S.P., et al., *Global magnitude of visual*  
27 *impairment caused by uncorrected refractive errors in 2004*. Bull World Health  
28 Organ, 2008. **86**(1): p. 63-70.  
29  
30  
31 2. Dandona, L., Dandona, R., Srinivas, M., et al., *Blindness in the Indian state of*  
32 *Andhra Pradesh*. Invest Ophthalmol Vis Sci, 2001. **42**(5): p. 908-16.  
33  
34 3. Dandona, R., Dandona, L., Srinivas, M., et al., *Moderate visual impairment in*  
35 *India: the Andhra Pradesh Eye Disease Study*. Br J Ophthalmol, 2002. **86**(4): p.  
36 373-7.  
37  
38 4. WHO, *Elimination of avoidable visual disability due to refractive errors*, in  
39 *WHO/PBL/00.79*. 2001, World Health Organization: Geneva.  
40  
41  
42 5. Holden, B.A., Fricke, T.R., Ho, S.M., et al., *Global vision impairment due to*  
43 *uncorrected presbyopia*. Arch Ophthalmol, 2008. **126**(12): p. 1731-9.  
44  
45  
46  
47  
48  
49  
50

*Barriers to utilisation of refraction of services*

6. Burke, A.G., Patel, I., Munoz, B., et al., *Population-based study of presbyopia in rural Tanzania*. *Ophthalmology*, 2006. **113**(5): p. 723-7.
7. Patel, I., Munoz, B., Burke, A.G., et al., *Impact of presbyopia on quality of life in a rural African setting*. *Ophthalmology*, 2006. **113**(5): p. 728-34.
8. Lu, Q., He, W., Murthy, G.V., et al., *Presbyopia and near-vision impairment in rural northern china*. *Invest Ophthalmol Vis Sci*. **52**(5): p. 2300-5.
9. Marmamula, S., Keeffe, J.E., and Rao, G.N., *Uncorrected refractive errors, presbyopia and spectacle coverage: results from a rapid assessment of refractive error survey*. *Ophthalmic Epidemiol*, 2009. **16**(5): p. 269-74.
10. Dandona, R., Dandona, L., Naduvilath, T.J., et al., *Design of a population-based study of visual impairment in India: The Andhra Pradesh Eye Disease Study*. *Indian J Ophthalmol*, 1997. **45**(4): p. 251-7.
11. Dandona, R. and Dandona, L., *Review of findings of the Andhra Pradesh Eye Disease Study: policy implications for eye-care services*. *Indian J Ophthalmol*, 2001. **49**(4): p. 215-34.
12. Dandona, R., Dandona, L., Naduvilath, T.J., et al., *Utilisation of eyecare services in an urban population in southern India: the Andhra Pradesh eye disease study*. *Br J Ophthalmol*, 2000. **84**(1): p. 22-7.
13. Kovai, V., Krishnaiah, S., Shamanna, B.R., et al., *Barriers to accessing eye care services among visually impaired populations in rural Andhra Pradesh, South India*. *Indian J Ophthalmol*, 2007. **55**(5): p. 365-71.

*Barriers to utilisation of refraction of services*

14. Nirmalan, P.K., Katz, J., Robin, A.L., et al., *Utilisation of eye care services in rural south India: the Aravind Comprehensive Eye Survey*. Br J Ophthalmol, 2004. **88**(10): p. 1237-41.
15. Hodges, L.E. and Berk, M.L., *Unmet need for eyeglasses: results from the 1994 Robert Wood Johnson Access to Care Survey*. J Am Optom Assoc, 1999. **70**(4): p. 261-5.
16. Ramke, J., du Toit, R., Palagyi, A., et al., *Correction of refractive error and presbyopia in Timor-Leste*. Br J Ophthalmol, 2007. **91**(7): p. 860-6.
17. Yasmin, S. and Minto, H., *Community perceptions of refractive errors in Pakistan*. Community Eye Health, 2007. **20**(63): p. 52-3.
18. Dandona, R., Dandona, L., Kovai, V., et al., *Population-based study of spectacles use in southern India*. Indian J Ophthalmol, 2002. **50**(2): p. 145-55.
19. Sherwin, J.C., Keeffe, J.E., Kuper, H., et al., *Functional presbyopia in a rural Kenyan population: the unmet presbyopic need*. Clin Experiment Ophthalmol, 2008. **36**(3): p. 245-51.
20. Nirmalan, P.K., Krishnaiah, S., Shamanna, B.R., et al., *A population-based assessment of presbyopia in the state of Andhra Pradesh, south India: the Andhra Pradesh Eye Disease Study*. Invest Ophthalmol Vis Sci, 2006. **47**(6): p. 2324-8.
21. Courtright, P., *Gender and blindness: Taking a global and a local perspective*. Oman J Ophthalmol, 2009. **2**(2): p. 55-6.
22. Courtright, P. and Bassett, K., *Gender and blindness: eye disease and the use of eye care services*. Community Eye Health, 2003. **16**(45): p. 11-2.

*Barriers to utilisation of refraction of services*

1  
2  
3  
4  
5  
6  
7  
8  
9  
10  
11  
12  
13  
14  
15  
16  
17  
18  
19  
20  
21  
22  
23  
24  
25  
26  
27  
28  
29  
30  
31  
32  
33  
34  
35  
36  
37  
38  
39  
40  
41  
42  
43  
44  
45  
46  
47  
48  
49  
50  
51  
52  
53  
54  
55  
56  
57  
58  
59  
60

23 Khanna, R., Raman, U., and Rao, G.N., *Blindness and poverty in India: the way forward*. Clin Exp Optom, 2007. **90**(6): p. 406-14.

24. Rao, G.N., *An infrastructure model for the implementation of VISION 2020: The Right to Sight*. Can J Ophthalmol 2004. **39**: p. 589–594.

For peer review only

STROBE 2007 (v4) Statement—Checklist of items that should be included in reports of *cross-sectional studies*

| Section/Topic                | Item # | Recommendation                                                                                                                                                                       | Reported on page # |
|------------------------------|--------|--------------------------------------------------------------------------------------------------------------------------------------------------------------------------------------|--------------------|
| Title and abstract           | 1      | (a) Indicate the study's design with a commonly used term in the title or the abstract                                                                                               | 2                  |
|                              |        | (b) Provide in the abstract an informative and balanced summary of what was done and what was found                                                                                  | 2                  |
| <b>Introduction</b>          |        |                                                                                                                                                                                      |                    |
| Background/rationale         | 2      | Explain the scientific background and rationale for the investigation being reported                                                                                                 | 3                  |
| Objectives                   | 3      | State specific objectives, including any prespecified hypotheses                                                                                                                     | 4                  |
| <b>Methods</b>               |        |                                                                                                                                                                                      |                    |
| Study design                 | 4      | Present key elements of study design early in the paper                                                                                                                              | 3                  |
| Setting                      | 5      | Describe the setting, locations, and relevant dates, including periods of recruitment, exposure, follow-up, and data collection                                                      | 3                  |
| Participants                 | 6      | (a) Give the eligibility criteria, and the sources and methods of selection of participants                                                                                          | 3                  |
| Variables                    | 7      | Clearly define all outcomes, exposures, predictors, potential confounders, and effect modifiers. Give diagnostic criteria, if applicable                                             | 6                  |
| Data sources/<br>measurement | 8*     | For each variable of interest, give sources of data and details of methods of assessment (measurement). Describe comparability of assessment methods if there is more than one group |                    |
| Bias                         | 9      | Describe any efforts to address potential sources of bias                                                                                                                            |                    |
| Study size                   | 10     | Explain how the study size was arrived at                                                                                                                                            | 5                  |
| Quantitative variables       | 11     | Explain how quantitative variables were handled in the analyses. If applicable, describe which groupings were chosen and why                                                         |                    |
| Statistical methods          | 12     | (a) Describe all statistical methods, including those used to control for confounding                                                                                                | 5                  |
|                              |        | (b) Describe any methods used to examine subgroups and interactions                                                                                                                  |                    |
|                              |        | (c) Explain how missing data were addressed                                                                                                                                          |                    |
|                              |        | (d) If applicable, describe analytical methods taking account of sampling strategy                                                                                                   |                    |
|                              |        | (e) Describe any sensitivity analyses                                                                                                                                                |                    |
| <b>Results</b>               |        |                                                                                                                                                                                      |                    |

|                          |     |                                                                                                                                                                                                                                                                                                                                                                                                               |    |
|--------------------------|-----|---------------------------------------------------------------------------------------------------------------------------------------------------------------------------------------------------------------------------------------------------------------------------------------------------------------------------------------------------------------------------------------------------------------|----|
| Participants             | 13* | (a) Report numbers of individuals at each stage of study—eg numbers potentially eligible, examined for eligibility, confirmed eligible, included in the study, completing follow-up, and analysed<br>(b) Give reasons for non-participation at each stage<br>(c) Consider use of a flow diagram                                                                                                               | 8  |
| Descriptive data         | 14* | (a) Give characteristics of study participants (eg demographic, clinical, social) and information on exposures and potential confounders<br>(b) Indicate number of participants with missing data for each variable of interest                                                                                                                                                                               | 8  |
| Outcome data             | 15* | Report numbers of outcome events or summary measures                                                                                                                                                                                                                                                                                                                                                          |    |
| Main results             | 16  | (a) Give unadjusted estimates and, if applicable, confounder-adjusted estimates and their precision (eg, 95% confidence interval). Make clear which confounders were adjusted for and why they were included<br>(b) Report category boundaries when continuous variables were categorized<br>(c) If relevant, consider translating estimates of relative risk into absolute risk for a meaningful time period |    |
| Other analyses           | 17  | Report other analyses done—eg analyses of subgroups and interactions, and sensitivity analyses                                                                                                                                                                                                                                                                                                                |    |
| <b>Discussion</b>        |     |                                                                                                                                                                                                                                                                                                                                                                                                               |    |
| Key results              | 18  | Summarise key results with reference to study objectives                                                                                                                                                                                                                                                                                                                                                      | 12 |
| Limitations              | 19  | Discuss limitations of the study, taking into account sources of potential bias or imprecision. Discuss both direction and magnitude of any potential bias                                                                                                                                                                                                                                                    | 15 |
| Interpretation           | 20  | Give a cautious overall interpretation of results considering objectives, limitations, multiplicity of analyses, results from similar studies, and other relevant evidence                                                                                                                                                                                                                                    | 15 |
| Generalisability         | 21  | Discuss the generalisability (external validity) of the study results                                                                                                                                                                                                                                                                                                                                         | 15 |
| <b>Other information</b> |     |                                                                                                                                                                                                                                                                                                                                                                                                               |    |
| Funding                  | 22  | Give the source of funding and the role of the funders for the present study and, if applicable, for the original study on which the present article is based                                                                                                                                                                                                                                                 | 17 |

\*Give information separately for cases and controls in case-control studies and, if applicable, for exposed and unexposed groups in cohort and cross-sectional studies.

**Note:** An Explanation and Elaboration article discusses each checklist item and gives methodological background and published examples of transparent reporting. The STROBE checklist is best used in conjunction with this article (freely available on the Web sites of PLoS Medicine at <http://www.plosmedicine.org/>, Annals of Internal Medicine at <http://www.annals.org/>, and Epidemiology at <http://www.epidem.com/>). Information on the STROBE Initiative is available at [www.strobe-statement.org](http://www.strobe-statement.org).
